# Supplementary material for: DHA Supplementation during Pregnancy in Women with Obesity Normalizes IGF2R Levels in the Placenta of Male Newborns
Source: Hindawi journal article supplement (doi:10.1155/2023/1515033), 2023-06-27
Supplement: f1 [file 1515033.f1.zip]

**Suppl Table 1.** Sequence of primers for Real Time PCR. **Ta:** Annealing temperature.

| <b>Gen</b>             | <b>Forward primer</b>    | <b>Reverse primer</b>    | <b>Ta<br/>(°C)</b> |
|------------------------|--------------------------|--------------------------|--------------------|
| <i>ADAM17</i>          | TCCAGCAGCATTCGGTAAGA     | TTTACCATCCACCACCACGA     | 56                 |
| <i>IGF2</i>            | GTTGAGGAGTGCTGTTTC       | AGGTGTCATATTGGAAGAAC     | 56                 |
| <i>IGF2R</i>           | AGGTGAATAAGGAAGAAGAGAC   | ACTGACTTGGTGGTAATATGG    | 56                 |
| <i>PLAU</i>            | AGCAGAGACACTAACGACTTCAG  | CTTACTCACACTTACACTCACAGC | 56                 |
| $\beta$ - <i>ACTIN</i> | AGAGCCTCGCCTTTGCCGATCC   | GACGACGAGCGCGGCGATATC    | 62                 |
| <i>GAPDH</i>           | TGTAGTTGAGGTCAATGAAGGG   | ACATCGCTCAGACACCATG      | 60                 |
| <i>YWHAZ</i>           | ACTTTTGGTACATTGTGGCTTCAA | CCGCCAGGACAAACCAGTAT     | 57                 |
