# Supplementary figures and images for: DHA Supplementation during Pregnancy in Women with Obesity Normalizes IGF2R Levels in the Placenta of Male Newborns
Source: Hindawi journal article supplement (doi:10.1155/2023/1515033), 2023-06-27

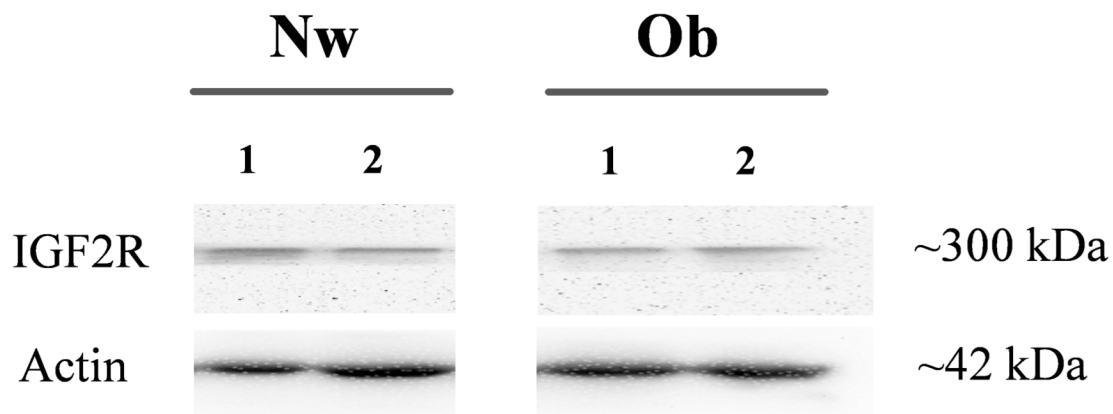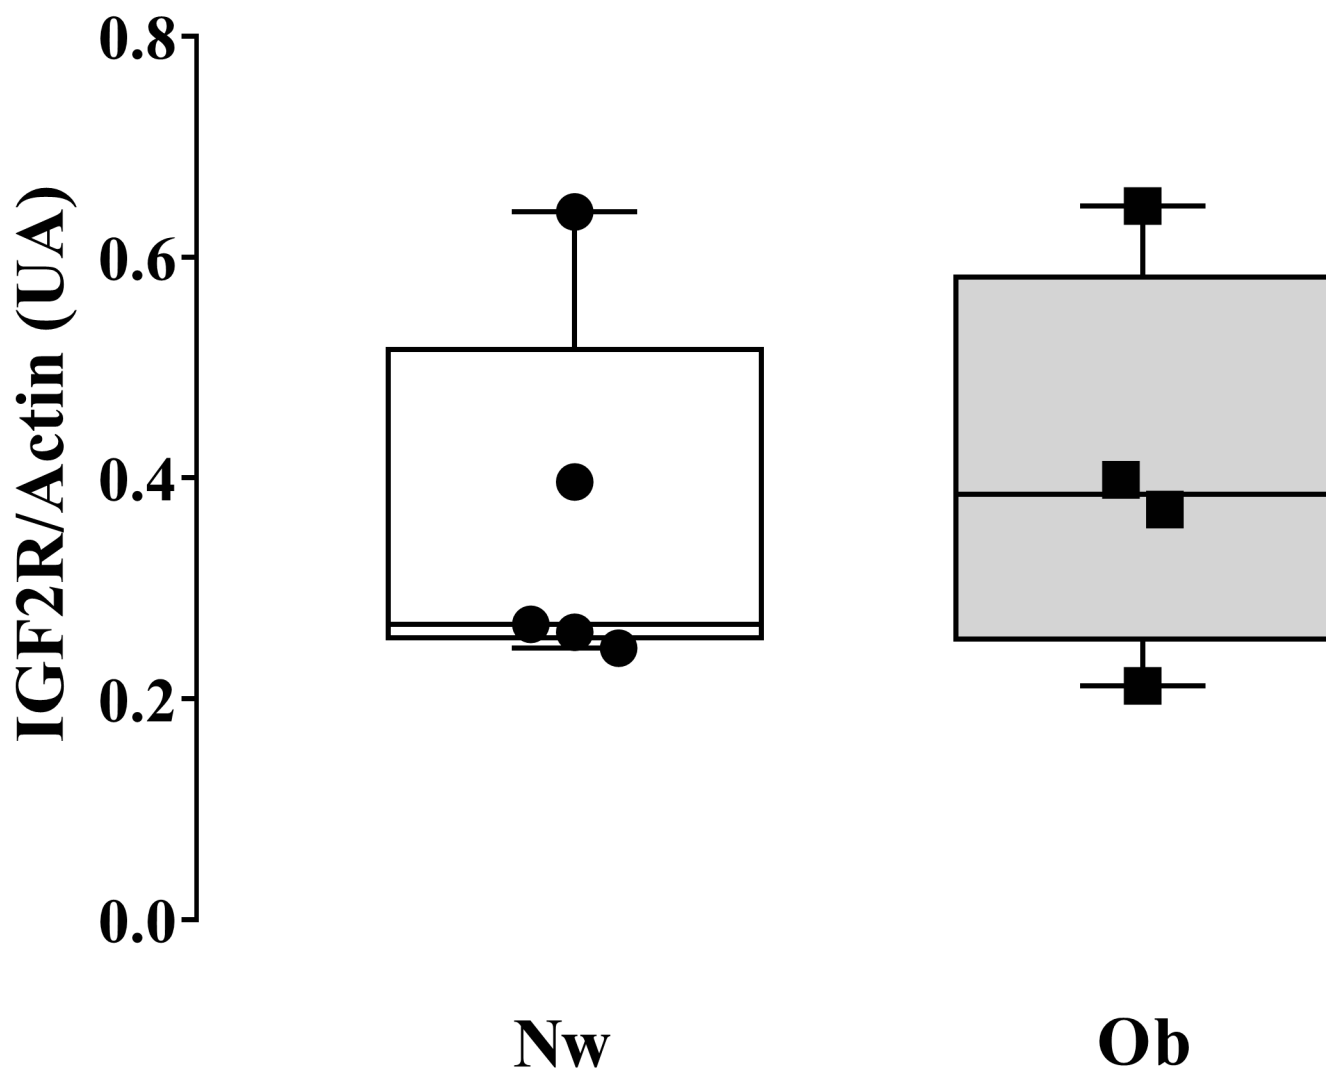

Supplement: f1 [file 1515033.f1.zip]
